# Supplementary material
Source: PubMed Central journal article supplement (PMC2668041)
Supplement: mmc1.pdf [file mmc1.pdf]

## Supplemental Data

### A Homozygous Mutation in Human *PRICKLE1*

### Causes an Autosomal-Recessive

### Progressive Myoclonus Epilepsy-Ataxia Syndrome

Alexander G. Bassuk, Robyn H. Wallace, Aimee Buhr, Andrew R. Buller, Zaid Afawi, Masahito Shimojo, Shingo Miyata, Shan Chen, Pedro Gonzalez-Alegre, Hilary L. Griesbach, Shu Wu, Marcus Nashelsky, Eszter K. Vldar, Dragana Antic, Polly J. Ferguson, Sebahattin Cirak, Thomas Voit, Matthew P. Scott, Jeffrey D. Axelrod, Christina Gurnett, Azhar S. Daoud, Sara Kivity, Miriam Y. Neufeld, Aziz Mazarib, Rachel Straussberg, Simri Walid, Amos D. Korczyn, Diane C. Slusarski, Samuel F. Berkovic, and Hatem I. El-Shanti

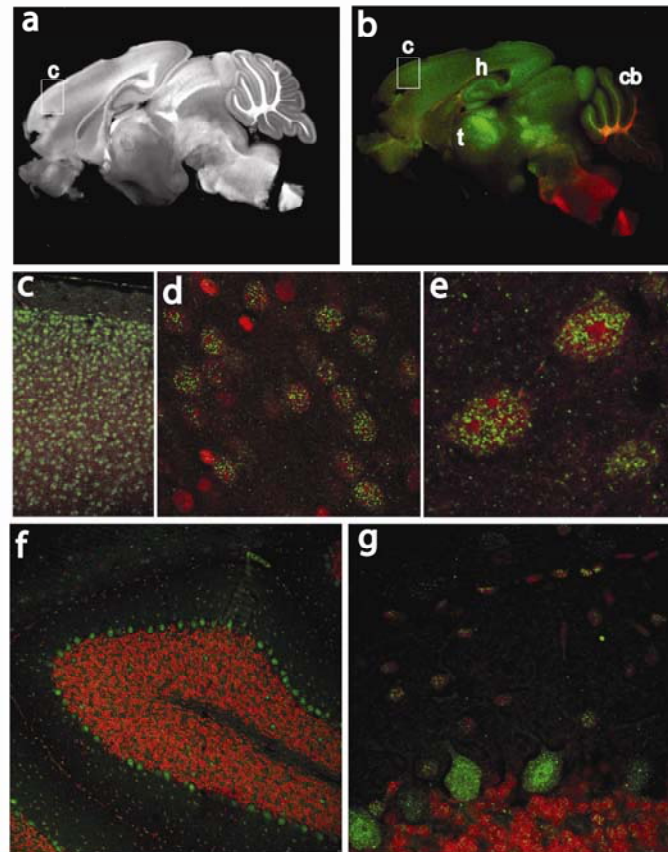

**Figure S1.** Prickle1 expression in P19 mouse brain. Light microscopy (a) shows sagittal block used for these sections. Specific brain regions are marked (b) including c=cortex, h=hippocampus, t=thalamus, and cb=cerebellum. Low power (c) and increasingly higher power sections (d,e) from cortex, and low power (f) and higher power sections from cerebellum. Prickle1 is in the green channel and DNA stain is in red.

**Table S1.** Candidate genes sequenced prior to discovering *PRICKLE1* as the causative gene for progressive myoclonic epilepsy with ataxia.

| Gene            | Name                                                       | Gene ID | OMIM   |
|-----------------|------------------------------------------------------------|---------|--------|
| <i>ASB8</i>     | Ankyrin repeat and SOCS box-containing 8                   | 140461  |        |
| <i>ALG10</i>    | Asparagine-linked glycosylation 10 homolog                 | 84920   | 603313 |
| <i>ALG10B</i>   | Asparagine-linked glycosylation 10 homolog B               | 144245  |        |
| <i>ABCD2</i>    | ATP-binding cassette, sub-family D, member 2               | 225     | 601081 |
| <i>NELL2</i>    | Nel-like 2                                                 | 4753    | 602320 |
| <i>SLC38A2</i>  | Solute carrier family 38, member 2                         | 54407   | 605180 |
| <i>LRRK2</i>    | Leucine-rich repeat kinase 2                               | 120892  | 609007 |
| <i>SLC2A13</i>  | Solute carrier family 2, member 13                         | 114134  | 611036 |
| <i>FLJ20489</i> | Hypothetical protein                                       | 55652   |        |
| <i>GLT8D3</i>   | Glycosyltransferase 8 domain-containing 3                  | 283464  |        |
| <i>CNTN1</i>    | Contactin 1                                                | 1272    | 600016 |
| <i>SLC38A1</i>  | Solute carrier family 38, member 1                         | 81539   | 608490 |
| <i>SLC38A4</i>  | Solute carrier family 38, member 4                         | 55089   | 608065 |
| <i>DBX2</i>     | Developing brain homeobox 2                                | 440097  |        |
| <i>ADAMTS20</i> | ADAM metallopeptidase with thrombospondin type 1 motif, 20 | 80070   | 611681 |
| <i>AMIGO2</i>   | adhesion molecule with Ig-like domain 2                    | 347902  |        |
| <i>ARID2</i>    | AT rich interactive domain 2 (ARID, RFX-like)              | 196528  | 609539 |
| <i>BICD1</i>    | bicaudal D homolog 1 (Drosophila)                          | 636     | 602204 |
| <i>C12ORF40</i> | chromosome 12 open reading frame 40                        | 283461  |        |
| <i>CPNE8</i>    | copine VIII                                                | 144402  |        |
| <i>DNM1L</i>    | dynamamin 1-like                                           | 10059   | 603850 |
| <i>FAM113B</i>  | family with sequence similarity 113, member B              | 91523   |        |
| <i>FGD4</i>     | FYVE, RhoGEF and PH domain containing 4                    | 121512  | 611104 |
| <i>RPAP3</i>    | RNA polymerase II associated protein                       | 79657   | 611477 |
| <i>HDAC7A</i>   | histone deacetylase 7A                                     | 51564   | 606542 |
| <i>IRAK4</i>    | interleukin-1 receptor-associated kinase 4                 | 51135   | 606883 |

|                 |                                                                     |        |        |
|-----------------|---------------------------------------------------------------------|--------|--------|
| <i>KIF21A</i>   | kinesin family member 21A                                           | 55605  | 608283 |
| <i>MUC19</i>    | mucin 19, oligomeric                                                | 283463 | 612170 |
| <i>P11</i>      | 26 serine protease                                                  | 8909   | 606720 |
| <i>PDZRN4</i>   | PDZ domain containing RING finger<br>4                              | 29951  | 609730 |
| <i>PKP2</i>     | plakophilin 2                                                       | 5318   | 602861 |
| <i>PLEKHA9</i>  | pleckstrin homology domain<br>containing, family A member 9         | 51054  |        |
| <i>PPHLN1</i>   | periphilin 1                                                        | 51535  | 608150 |
| <i>TWF1</i>     | twinfilin, actin-binding protein                                    | 5756   | 610932 |
| <i>PUS7L</i>    | pseudouridylate synthase 7 homolog<br>( <i>S. cerevisiae</i> )-like | 83448  |        |
| <i>RAPGEF3</i>  | Rap guanine nucleotide exchange<br>factor (GEF) 3                   | 10411  | 606057 |
| <i>SFRS2IP</i>  | splicing factor, arginine/serine-rich 2,<br>interacting protein     | 9169   | 603668 |
| <i>SYT10</i>    | synaptotagmin X                                                     | 341359 |        |
| <i>TMEM106C</i> | transmembrane protein 106C                                          | 79022  |        |
| <i>TMEM117</i>  | transmembrane protein 117                                           | 84216  |        |
| <i>TMEM16F</i>  | transmembrane protein 16F                                           | 196527 | 608663 |
| <i>VDR</i>      | vitamin D receptor                                                  | 7421   | 601769 |
| <i>YAF2</i>     | YY1 associated factor 2                                             | 10138  | 607534 |
| <i>YARS2</i>    | tyrosyl-tRNA synthetase 2<br>(mitochondrial)                        | 51067  | 610957 |
| <i>ZCRB1</i>    | zinc finger CCHC-type and RNA<br>binding motif 1                    | 85437  | 610750 |

**Table S2.** Primers and conditions for *PRICKLE1* sequencing. F= forward primer.

R=reverse primer. NF=nested forward primer. bp=basepairs.

| Primer sequence |                                      | Product Size | Annealing Temperature |
|-----------------|--------------------------------------|--------------|-----------------------|
| EXON1           | F-GCC GGA AGG AAT CTA AGT GT         | 1040bp       | 52°C                  |
|                 | NF-TTT TCT CCC TGC GCA TAA TC        |              |                       |
|                 | R-CAG CCC AAC AAA CCG ATT AT         |              |                       |
| EXON2           | F-GGT CGG GGG TAA GAG AAA TG         | 353bp        | 60.5°C                |
|                 | R-TGG TAT TCC AGC ATC TCA GTG        |              |                       |
| EXON3           | F-AGA GGC CAA ACC CTG TAC CT         | 303bp        | 60.5°C                |
|                 | R-GGA GTT GGG GTT TAT GAG CA         |              |                       |
| EXON4           | F-TTC CCT TTT TCT AGA GAG GCT GT     | 400bp        | 60.5°C                |
|                 | R-TGC TAG TCC AGT CAC CTA CCC        |              |                       |
| EXON5           | F-AGG AAA GCC TGA GAA TCC TG         | 350bp        | 60.5°C                |
|                 | R-ATT TTG CTT GAT GTA AAC AGT<br>GGA |              |                       |
| EXON6           | F-TTT AAG AGC CAG TGT CTG TCC A      | 452bp        | 62°C                  |
|                 | NF-CCC GGA AAA CAT GCA GTT AC        |              |                       |
|                 | R-CAA AGC TCA TCA GCT GGA AC         |              |                       |
|                 | NR-CTA GGT GAC AGG GCA GAC G         |              |                       |
| EXON7A          | F-GCT CCC CCA TAC CCA TAA TC         | 451bp        | 60.5°C                |
|                 | R-TTC GAG AAAGGG TGT CAT CA          |              |                       |
| EXON7B          | F-CAA GTT TCC TGG CCT CTC AG         | 367bp        | 60.5°C                |
|                 | R-CAG TCC ATC TTG TGA CTG TGC        |              |                       |
| EXON7C          | F-CCA GAG CCT TGC AAG TAA AAA        | 350bp        | 60.5°C                |
|                 | R-ACT GCG CCT GGC TTG AAT            |              |                       |
| EXON8A          | F-TTG AGA TTG GAA ATT TTC TTT<br>GAA | 416bp        | 60.5°C                |
|                 | R-TGC CGG ATT TCA ATG TCA TA         |              |                       |
| EXON8B          | F-ACC CCA GCA GGT CAA GTT TT         | 424bp        | 64°C                  |
|                 | R-GGA GGA GGA GGA AGA ACA CC         |              |                       |
| EXON8C          | F-TGA ATC GGT TTCTGG GAC TC          | 369bp        | 62°C                  |
|                 | R-ACA TGG GCA AAG AAA GCA CT         |              |                       |
